# Supplementary material
Source: publisher figshare collection journal article supplement (https://gsapubs.figshare.com/ndownloader/files/23296412)
Supplement: Supplementary file 1 [file 23296412]

## Sheet: Sheet1
							Correlation	U O/				Age (Ma)	Age (Ma)	Age (Ma)	Age (Ma)	Age (Ma)	Age (Ma)
	206Pb*/	206Pb*/	207Pb*/	207Pb*/	207Pb*/	207Pb*/	of Concordia	U		U	Th/	206Pb/	206Pb/	207Pb/	207Pb/	207Pb/	207Pb/
	238U	238U	235U	235U	206Pb*	206Pb*	Ellipses			ppm	U	238U	238U	235U	235U	206Pb	206Pb
		1 s.e.		1 s.e.		1 s.e.							1 s.e.		1 s.e.		1 s.e.
E30_3027_UPb_z@8	0.254	0.0128	3.1	0.158	0.0885	0.00106	0.972	9.02	(204Pb)	455	0.11	1457	65.9	1431	39.3	1394	23
E30_3027_UPb_z@15	5.56e-06	0.000215	0.00974	0.0301	12.7	459	0.813	9.38	(206/8Pb)	74	1.32	0.03584	1.39	9.838	30.3	-	-
E30_3027_UPb_z@18	0.0104	0.000738	0.0309	0.0434	0.0215	0.0298	0.365	9.09	(204Pb)	211	0.73	66.68	4.71	30.86	42.8	-	-
E30_3027_UPb_z@19	0.26	0.0172	3.61	0.276	0.101	0.00507	0.759	9.5	(204Pb)	97	0.02	1491	87.9	1551	60.9	1634	93.7
M203_3921@1	0.00419	0.00101	0.0311	0.0346	0.0538	0.0554	0.437	8.63	(204Pb)	80	1.83	26.95	6.49	31.09	34	364	2320
M203_3921@2	0.018	0.00122	0.111	0.0122	0.0446	0.00372	0.655	8.19	(204Pb)	528	0.5	115	7.7	106.7	11.1	-	-
M203_3921@3	0.00488	0.00029	0.044	0.0102	0.0654	0.0135	0.539	8.38	(204Pb)	597	0.63	31.39	1.86	43.75	9.93	788.1	432
M203_3921@4	0.027	0.0012	0.176	0.0111	0.0472	0.00204	0.727	8.6	(204Pb)	380	0.94	171.7	7.54	164.4	9.56	59.49	103
M203_3921@5	0.263	0.0113	3.78	0.165	0.104	0.00058	0.992	8.67	(204Pb)	343	0.35	1504	57.5	1589	35.1	1704	10.2
M203_3921@6	0.00758	0.000399	0.043	0.00957	0.0412	0.00839	0.457	8.49	(204Pb)	471	0.89	48.66	2.55	42.75	9.31	-	-
M203_3921@7	0.00275	0.000157	0.0225	0.00875	0.0594	0.0212	0.597	8.55	(204Pb)	383	1.07	17.7	1.01	22.61	8.69	581.6	776
M203_3921@8	0.00271	0.000142	0.0169	0.00558	0.0452	0.0141	0.441	8.56	(204Pb)	278	0.56	17.42	0.912	16.96	5.57	-	-
M203_3921@9	0.274	0.0207	3.35	0.259	0.0888	0.00128	0.983	8.31	(204Pb)	120	0.87	1559	105	1493	60.5	1400	27.6
M203_3921@10	0.296	0.014	4.29	0.205	0.105	0.000535	0.994	8.48	(204Pb)	581	0.39	1672	69.8	1691	39.4	1715	9.36
M203_3921@11	0.0363	0.00245	0.248	0.0303	0.0494	0.00514	0.53	8.48	(204Pb)	361	1.41	229.8	15.2	224.5	24.7	169	243
M203_3921@12	0.182	0.0072	2.25	0.0906	0.0894	0.000943	0.965	9.2	(204Pb)	303	0.63	1080	39.3	1197	28.3	1414	20.2
M203_3954@1	0.183	0.00946	2.27	0.12	0.0896	0.000543	0.994	8.47	(204Pb)	472	0.29	1085	51.5	1202	37.3	1418	11.6
M203_3954@2	0.00455	0.000447	0.0279	0.0437	0.0446	0.0666	0.713	8.56	(204Pb)	106	1.09	29.24	2.87	27.97	43.1	-	-
M203_3954@3	0.00196	0.000173	0.00482	0.0171	0.0178	0.062	0.847	8.91	(204Pb)	121	1.62	12.63	1.12	4.88	17.3	-	-
M203_3954@4	0.00356	0.000201	0.02	0.00681	0.0407	0.0132	0.388	8.47	(204Pb)	287	1.59	22.9	1.29	20.07	6.78	-	-
M203_3954@5	0.00672	0.00027	0.0456	0.00323	0.0492	0.00271	0.63	8.73	(204Pb)	866	0.48	43.19	1.73	45.28	3.13	157.3	129
M203_3954@6	0.144	0.00926	1.47	0.111	0.0741	0.00235	0.908	8.89	(204Pb)	81	0.33	869.3	52.1	919.9	45.4	1043	64
M203_3954@7	0.0257	0.00107	0.172	0.00745	0.0486	0.000748	0.935	8.73	(204Pb)	1291	0.11	163.4	6.7	161.1	6.46	127.4	36.2
M203_3954@8	0.26	0.0119	3.61	0.172	0.101	0.00081	0.986	8.7	(204Pb)	128	0.66	1488	61	1552	37.9	1641	14.9
M203_3954@9	0.0169	0.00107	0.111	0.0095	0.0477	0.00226	0.839	8.36	(204Pb)	827	0.59	108.1	6.76	107.2	8.68	86.55	112
M203_3954@10	0.00924	0.000487	0.0656	0.0155	0.0515	0.0112	0.447	8.87	(204Pb)	198	0.27	59.29	3.11	64.46	14.7	261	500
M203_3954@11	0.0223	0.00105	0.144	0.0121	0.0468	0.00319	0.592	8.64	(204Pb)	464	1.01	141.9	6.62	136.2	10.8	37.96	163
M203_3954@12	0.0275	0.00138	0.175	0.0129	0.0461	0.0025	0.678	8.58	(204Pb)	711	1.04	175.1	8.66	163.8	11.1	3.238	130
M203_3954@13	0.00503	0.000265	0.0224	0.0133	0.0323	0.0184	0.501	8.64	(204Pb)	183	1.62	32.31	1.7	22.45	13.2	-	-
M203_3954@14	0.0173	0.00076	0.114	0.00603	0.0479	0.00114	0.894	8.66	(204Pb)	1322	0.39	110.5	4.82	109.9	5.5	96.43	56.5
M203_3954@15	0.0049	0.000192	0.0308	0.00167	0.0457	0.00145	0.814	8.94	(204Pb)	1650	0.38	31.48	1.23	30.81	1.64	-	-
M203_3987@1	0.0329	0.00163	0.237	0.0131	0.0522	0.00177	0.796	8.72	(204Pb)	381	0.83	208.6	10.2	215.9	10.7	295.4	77.3
M203_3987@2	0.013	0.000728	0.0729	0.012	0.0407	0.00615	0.408	8.39	(204Pb)	291	0.33	83.15	4.63	71.46	11.4	-	-
M203_3987@3	0.0121	0.000638	0.106	0.0218	0.0634	0.0118	0.484	8.59	(204Pb)	336	0.64	77.54	4.07	102.1	20	721.5	396
M203_3987@4	0.169	0.00629	2.04	0.0758	0.0876	0.000427	0.992	9.36	(204Pb)	302	0.62	1005	34.7	1128	25.3	1375	9.37
M203_3987@5	0.0273	0.00136	0.185	0.0135	0.0492	0.00229	0.774	8.49	(204Pb)	705	0.8	173.5	8.55	172.2	11.5	154.9	109
M203_3987@6	0.00136	6.8e-05	0.00902	0.00388	0.0481	0.0194	0.583	8.96	(204Pb)	468	0.19	8.757	0.438	9.12	3.9	106.1	951
M203_3987@7	0.289	0.0148	4.11	0.212	0.103	0.000496	0.996	8.51	(204Pb)	928	0.05	1635	73.9	1656	42.3	1681	8.87
M203_3987@8	0.0246	0.00121	0.165	0.0119	0.0488	0.00215	0.796	8.6	(204Pb)	302	1.54	156.6	7.62	155.4	10.3	137.5	104
M203_3987@9	0.0263	0.00199	0.177	0.0442	0.0487	0.0109	0.48	8.5	(204Pb)	82	0.35	167.4	12.5	165.3	38.1	135.1	526
M203_3987@10	0.00214	0.000163	0.0134	0.0111	0.0454	0.0357	0.591	8.89	(204Pb)	142	0.9	13.78	1.05	13.5	11.1	-	-
M203_3987@11	0.0146	0.000805	0.0904	0.00818	0.0448	0.0036	0.479	8.72	(204Pb)	314	0.36	93.69	5.12	87.89	7.62	-	-
M203_3987@12	0.0163	0.000755	0.109	0.00571	0.0485	0.00126	0.87	8.49	(204Pb)	1538	0.62	103.9	4.79	104.7	5.23	123.4	61.2
M203_3987@13	0.0162	0.00101	0.112	0.00821	0.0501	0.00159	0.904	8.46	(204Pb)	1859	0.34	103.3	6.39	107.3	7.5	197.5	73.7
M203_3987@14	0.0167	0.000968	0.11	0.00642	0.0478	0.00137	0.879	8.49	(204Pb)	2204	0.17	106.8	6.14	106	5.87	89.68	67.7
M201_3080@2	0.00255	0.000165	0.013	0.0096	0.0369	0.026	0.568	8.54	(204Pb)	230	1.23	16.43	1.06	13.11	9.62	-	-
M201_3080@3	0.00805	0.000415	0.0629	0.00814	0.0566	0.00693	0.333	9.28	(204Pb)	44	1.26	51.68	2.65	61.89	7.77	477.4	270
M201_3080@4	0.00418	0.000368	0.0136	0.0148	0.0236	0.0249	0.392	8.17	(204Pb)	327	0.48	26.9	2.36	13.72	14.8	-	-
M201_3080@5	0.276	0.0163	3.88	0.228	0.102	0.000775	0.992	8.42	(204Pb)	928	0.25	1573	82.5	1609	47.5	1656	14.1
M201_3080@6	0.00192	0.000146	0.0453	0.0121	0.171	0.0362	0.794	10	(204Pb)	55	3.25	12.38	0.941	44.95	11.7	2566	354
M201_3080@7	0.00471	0.000498	0.00393	0.0143	0.00605	0.0219	0.264	7.88	(204Pb)	948	0.54	30.3	3.2	3.982	14.5	-	-
M201_3080@8	0.3	0.0207	4.21	0.3	0.102	0.000898	0.993	8.4	(204Pb)	538	0.54	1690	103	1676	58.5	1659	16.3
M201_3080@9	0.171	0.0148	2.58	0.212	0.109	0.00134	0.991	8.28	(204Pb)	2121	2.38	1020	81.7	1294	60.1	1783	22.5
M201_3080@11	0.00676	0.000683	0.0436	0.00514	0.0467	0.003	0.84	7.76	(204Pb)	983	0.53	43.43	4.37	43.29	5	35.45	154
M201_3080@12	0.000336	0.00132	-0.261	0.16	-5.63	-25.2	0.897	8.14	(204Pb)	58	2.56	2.164	8.49	-	-	-	-
M201_3080@13	0.00254	0.000163	0.00432	0.00885	0.0123	0.0249	0.476	8.36	(204Pb)	1310	0.09	16.37	1.05	4.38	8.95	-	-
M201_3080@14	0.00219	0.000147	-0.00848	0.0139	-0.0281	-0.0474	0.816	9.23	(204Pb)	214	1.33	14.11	0.944	-	-	-	-
M201_3080@15	0.011	0.00043	0.0729	0.00354	0.0481	0.00104	0.901	8.81	(204Pb)	1217	0.01	70.5	2.74	71.43	3.35	102.5	50.9
RC_z10UPb@1	0.000293	3.64e-05	0.0143	0.00378	0.355	0.0567	0.909	8.735	(uc)	128.001	0.556678	1.22416	0.317093	-	-	-	-
RC_z11UPb@1	0.0016	0.000346	0.167	0.0362	0.753	0.0158	0.995	8.613	(uc)	106.38	0.666667	1.00722	3.02447	-	-	-	-
RC_z12UPb@1	0.0448	0.00365	0.331	0.028	0.0536	0.00075	0.987	8.411	(uc)	428.634	0.596512	281.883	22.5738	-	-	-	-
RC_z13UPb@1	0.000179	1.18e-05	0.00561	0.000557	0.228	0.015	0.755	8.92	(uc)	768.618	0.740851	0.969338	0.0822976	-	-	-	-
RC_z14UPb@1	0.000227	1.36e-05	0.00738	0.000464	0.236	0.01	0.763	8.865	(uc)	1336.83	0.638764	1.18958	0.091484	-	-	-	-
RC_z15UPb@1	0.000452	2.97e-05	0.00614	0.000577	0.0986	0.00434	0.908	9.066	(uc)	1372.2	0.611968	2.80186	0.194127	-	-	-	-
RC_z16UPb@1	0.000168	9.69e-06	0.0069	0.000439	0.299	0.0116	0.799	9.269	(uc)	1149.15	0.162357	0.816433	0.0671934	-	-	-	-
RC_z17UPb@1	0.298	0.0196	4.24	0.275	0.103	0.000409	0.998	8.878	(uc)	360.26	0.190623	1682.12	98.0635	-	-	-	-
RC_z18UPb@1	0.0473	0.00316	0.353	0.0235	0.0542	0.000737	0.979	8.945	(uc)	255.106	0.279044	297.282	19.494	-	-	-	-
RC_z19UPb@1	2.17e-05	1.49e-06	0.00137	0.000101	0.459	0.0347	0.433	8.915	(uc)	7033.09	1.32408	0.152918	0.0111695	-	-	-	-
RC_z1UPb@1	0.00339	0.000288	0.0605	0.0106	0.13	0.0164	0.735	8.364	(uc)	169.733	1.40391	19.5488	1.94472	-	-	-	-
RC_z1UPb@2	0.00267	0.000203	0.0333	0.00392	0.0905	0.00696	0.768	8.72	(uc)	185.977	1.38838	16.2697	1.32387	-	-	-	-
RC_z20UPb@1	0.0359	0.00202	0.257	0.0161	0.0519	0.000889	0.964	8.807	(uc)	405.764	1.38722	226.856	12.6022	-	-	-	-
RC_z21UPb@1	0.000193	1.49e-05	0.0121	0.00168	0.453	0.0551	0.494	9.007	(uc)	242.61	0.510551	0.679501	0.134962	-	-	-	-
RC_z22UPb@1	0.295	0.0188	4.28	0.275	0.105	0.000514	0.997	8.874	(uc)	155.893	0.906764	1662.22	94.4127	-	-	-	-
RC_z23UPb@1	0.000265	2.9e-05	0.0166	0.00201	0.455	0.0491	0.566	8.751	(uc)	175.863	0.683666	0.895201	0.218652	-	-	-	-
RC_z24UPb@1	0.000129	7.24e-06	0.00286	0.000379	0.16	0.0188	0.473	9.029	(uc)	1380.92	0.0765432	0.79707	0.0513356	-	-	-	-
RC_z25UPb@1	0.000549	4.82e-05	0.0537	0.00545	0.709	0.035	0.874	8.723	(uc)	208.446	0.357349	0.605044	0.437203	-	-	-	-
RC_z26UPb@1	0.276	0.0186	3.91	0.257	0.103	0.000461	0.998	9.049	(uc)	256.285	0.49427	1559.89	94.8203	-	-	-	-
RC_z27UPb@1	6.06e-05	4.59e-06	0.00582	0.00058	0.697	0.0584	0.572	8.844	(uc)	609.707	0.844974	0.150971	0.0441276	-	-	-	-
RC_z27UPb@2	3.96e-05	3.63e-06	0.0023	0.000274	0.422	0.0528	0.315	8.862	(uc)	784.886	0.845695	0.219379	0.0280489	-	-	-	-
RC_z28UPb@1	0.0107	0.000606	0.0774	0.00511	0.0525	0.00143	0.912	8.979	(uc)	501.016	0.332217	68.2477	3.87596	-	-	-	-
RC_z29UPb@1	0.000193	1.62e-05	0.00719	0.000901	0.27	0.0384	0.116	9.145	(uc)	240.016	0.579778	0.975381	0.116141	-	-	-	-
RC_z2UPb@1	0.00045	8.1e-05	0.0363	0.00781	0.585	0.029	0.984	8.411	(uc)	153.087	0.38316	0.975646	0.683268	-	-	-	-
RC_z30UPb@1	0.000299	2.58e-05	0.0177	0.00243	0.43	0.0522	0.485	8.762	(uc)	106.993	0.620776	1.06421	0.215547	-	-	-	-
RC_z31UPb@1	0.00018	1.82e-05	0.00886	0.00105	0.357	0.0314	0.689	8.926	(uc)	254.163	0.620776	0.78447	0.13143	-	-	-	-
RC_z32UPb@1	0.000197	1.58e-05	0.00619	0.000702	0.228	0.0194	0.662	8.924	(uc)	478.618	0.575072	1.06013	0.109273	-	-	-	-
RC_z33UPb@1	0.111	0.00677	0.946	0.0566	0.062	0.000625	0.986	8.858	(uc)	143.75	0.555742	676.356	39.4009	-	-	-	-
RC_z34UPb@1	0.000283	3.26e-05	0.0133	0.00217	0.342	0.0308	0.844	8.968	(uc)	124.346	0.546556	1.2163	0.2432	-	-	-	-
RC_z35UPb@1	0.012	0.000735	0.0825	0.00515	0.0499	0.00115	0.931	8.854	(uc)	426.276	0.64879	76.6219	4.691	-	-	-	-
RC_z36UPb@1	0.376	0.0258	6.2	0.43	0.12	0.000606	0.997	8.848	(uc)	127.435	0.942966	2078.75	121.751	-	-	-	-
RC_z37UPb@1	0.169	0.0106	1.76	0.116	0.0756	0.000614	0.993	9	(uc)	227.049	0.683666	1003.45	58.7505	-	-	-	-
RC_z38UPb@1	0.000316	2.37e-05	0.0156	0.00137	0.36	0.0179	0.825	8.299	(uc)	1149.63	0.715213	1.30049	0.171203	-	-	-	-
RC_z39UPb@1	0.00241	0.000312	0.206	0.0367	0.62	0.0336	0.987	8.976	(uc)	214.576	0.599396	4.15525	2.88547	-	-	-	-
RC_z3UPb@1	0.000152	1.84e-05	0.00669	0.00114	0.32	0.0349	0.773	9.262	(uc)	217.5	0.367407	0.720566	0.13493	-	-	-	-
RC_z40UPb@1	0.000263	2.99e-05	0.0134	0.00138	0.368	0.0547	0.0661	8.822	(uc)	159.618	0.394433	1.08119	0.20786	-	-	-	-
RC_z41UPb@1	0.000156	1.03e-05	0.00438	0.000423	0.203	0.0174	0.495	9.73	(uc)	527.659	1.21109	0.891951	0.0705516	-	-	-	-
RC_z42UPb@1	0.000361	2.74e-05	0.0201	0.00233	0.403	0.0299	0.781	8.723	(uc)	693.878	0.904284	1.34307	0.220173	-	-	-	-
RC_z43UPb@1	0.000227	1.59e-05	0.00962	0.000895	0.308	0.023	0.614	9.032	(uc)	429.813	0.850043	1.05487	0.114254	-	-	-	-
RC_z44UPb@1	0.000462	2.19e-05	0.0358	0.00213	0.562	0.018	0.843	9.157	(uc)	660.163	0.786677	1.08706	0.185404	-	-	-	-
RC_z45UPb@1	0.000207	1.73e-05	0.00974	0.0011	0.341	0.0349	0.492	9	(uc)	244.967	0.678059	0.916554	0.127625	-	-	-	-
RC_z46UPb@1	0.000228	1.99e-05	0.013	0.00129	0.414	0.0377	0.527	9.069	(uc)	189.16	0.453589	0.861997	0.14749	-	-	-	-
RC_z47UPb@1	0.0109	0.00251	1.15	0.269	0.766	0.0147	0.997	7.579	(uc)	122.602	0.864865	5.22135	22.1713	-	-	-	-
RC_z48UPb@1	0.000304	4.12e-05	0.0197	0.00274	0.469	0.0482	0.721	8.91	(uc)	126.091	0.640413	0.978048	0.307298	-	-	-	-
RC_z49UPb@1	5.91e-05	4.6e-06	0.00393	0.000584	0.483	0.0699	0.31	9.085	(uc)	535.439	0.33144	0.254113	0.0443377	-	-	-	-
RC_z4UPb@1	0.000146	1.29e-05	0.00427	0.000923	0.212	0.0395	0.517	9.78	(uc)	105.956	0.39459	0.829488	0.0981193	-	-	-	-
RC_z50UPb@1	0.000484	3.1e-05	0.00626	0.000719	0.0939	0.00803	0.678	9.127	(uc)	438.537	0.537669	3.01359	0.203826	-	-	-	-
RC_z51UPb@1	0.000223	2.05e-05	0.0079	0.000921	0.258	0.0326	0.278	8.97	(uc)	214.553	0.531049	1.13167	0.141986	-	-	-	-
RC_z52UPb@1	0.000225	1.66e-05	0.014	0.00145	0.452	0.0551	0.0846	9.327	(uc)	129.769	0.637532	0.782188	0.134707	-	-	-	-
RC_z53UPb@1	0.000194	1.47e-05	0.00541	0.000834	0.203	0.0273	0.484	9.067	(uc)	243.789	0.490119	1.08429	0.105794	-	-	-	-
RC_z54UPb@1	0.000183	1.2e-05	0.0078	0.000708	0.309	0.0245	0.522	9.16	(uc)	396.098	0.36178	0.870219	0.0870591	-	-	-	-
RC_z5UPb@1	0.000586	0.000101	0.0495	0.00851	0.613	0.032	0.954	8.735	(uc)	86.3398	0.479691	1.1093	0.808974	-	-	-	-
RC_z6UPb@1	0.000564	5.83e-05	0.0457	0.0054	0.588	0.0276	0.919	8.604	(uc)	472.959	0.525981	1.18773	0.483807	-	-	-	-
RC_z7UPb@1	0.000169	1.05e-05	0.00304	0.000264	0.131	0.00937	0.578	8.744	(uc)	1032.92	0.137415	1.05949	0.0692978	-	-	-	-
RC_z8UPb@1	0.0465	0.00321	0.339	0.0244	0.0529	0.000461	0.993	8.632	(uc)	988.358	0.0504578	292.933	19.8177	-	-	-	-
RC_z9UPb@1	0.000737	6.95e-05	0.0707	0.00544	0.695	0.0358	0.838	8.348	(uc)	254.634	0.222372	0.869313	0.543084	-	-	-	-
CP0101_g2_s1	0.00269	0.00033	0.3	0.0381	0.808	0.0217	0.978	7.099	(uc)	348.959	1.44714	0.517646	3.01497	-	-	-	-
CP0502_g1_s1	0.00111	0.000227	0.121	0.0244	0.795	0.0378	0.973	9.031	(uc)	119.708	1.42226	0.385699	2.00339	-	-	-	-
CP0502_g4_s1	0.281	0.0125	3.97	0.176	0.102	0.000292	0.998	9.296	(uc)	598.195	1.16616	1590.32	63.4347	-	-	-	-
CP0502_g8_s1	0.000141	2.95e-05	0.0158	0.00307	0.81	0.0308	0.985	9.166	(uc)	1457.78	4.83527	0.0288656	0.256532	-	-	-	-
E-30 Cerro Prieto well N 32° 23' 57.086" W 115° 12' 51.315"
M203 Cerro Prieto well N 32° 23' 33.463" W 115° 11' 12.434"
M201 Cerro Prieto well N 32° 24' 34.768" W 115° 10' 23.248"
RC Roca Consag lava N 31° 06' 45" W 114° 29' 17"
CP0101 and CP0502 Cerro Prieto lava N 32° 25' 25" W 115° 18' 5"
